# Supplementary material for: The epimerisation of 2-tetrahydropyranol catalysed by the tautomeric couples 2-pyridone/2-hydroxypyridine and formamide/formamidic acid as a model for the sugar's mutarotation: a theoretical study
Source: Royal Society of Chemistry journal article supplement (doi:10.1039/b210328c), 2003-02-11
Supplement: b210328c_tab2.doc [file b210328c_tab2.doc]

| **Electronic Supplementary Information - Table S2** Electronic energy (*E*/*E*h) solvation energy (*E*sol/kcal mol‑1) and relative energy (*E*rel/kcal mol-1) calculated for 2-pyridone (PD), hydroxypyridine (HP), their dimers and respective transition states in vacuum and in benzene by means of the PCM method with and without geometry optimisation. The B3LYP/6-31G*(*) computational level (see Section 2) was used in the calculations. PCM calculations were performed by using the united-atom (UA) and the Pauling’s atomic radii. The PCM energy is the sum of electronic energy, dispersion-repulsion and cavitation energy.53 | | | | | | | | |
| --- | --- | --- | --- | --- | --- | --- | --- | --- |
|  |  |  |  |  |  |  |  |  |
|  |  | *E* | *E* | *E* | *E*sol | *E*sol | *E*rel | *E*rel |
|  |  | vacuum | PCM-UA | PCM-Pauling | UA | Pauling | UA | Pauling |
|  |  |  |  |  |  |  |  |  |
| single point calculations (geometry optimised in vacuum) | | | | | | | | |
|  |  |  |  |  |  |  |  |  |
| **13** | PD | -323.52127 | -323.52436 | -323.52596 | -1.94 | -2.94 | 0.00 | 0.00 |
| **14** | HP | -323.52136 | -323.52299 | -323.52279 | -1.02 | -0.90 | 0.86 | 1.99 |
| **15** | (PD)2 | -647.07928 | -647.07847 | -647.07857 | 0.51 | 0.45 | 0.00 | 0.00 |
| **16** | TS(15-17) | -647.06625 | -647.06590 | -647.06523 | 0.22 | 0.65 | 7.89 | 8.37 |
| **17** | (HP)2 | -647.07323 | -647.07232 | -647.07075 | 0.57 | 1.55 | 3.86 | 4.91 |
| **18** | PD-HP | -647.07294 | -647.07264 | -647.07169 | 0.19 | 0.79 | 3.66 | 4.32 |
| **19** | TS(18-18) | -647.06165 | -647.06187 | -647.06108 | -0.14 | 0.36 | 10.42 | 10.98 |
|  |  |  |  |  |  |  |  |  |
| after geometry re-optimisation in benzene | | | | | | | | |
|  |  |  |  |  |  |  |  |  |
| **13** | PD | -323.52127 | -323.52452 | -323.52603 | -2.03 | -2.99 | 0.00 | 0.00 |
| **14** | HP | -323.52136 | -323.52310 | -323.52273 | -1.09 | -0.86 | 0.89 | 2.07 |
| **15** | (PD)2 | -647.07928 | -647.07861 | -647.07849 | 0.42 | 0.50 | 0.00 | 0.00 |
| **16** | TS(15-17) | -647.06625 | -647.06598 | -647.06513 | 0.17 | 0.70 | 7.93 | 8.38 |
| **17** | (HP)2 | -647.07323 | -647.07252 | -647.06982 | 0.44 | 2.14 | 3.82 | 5.44 |
| **18** | PD-HP | -647.07294 | -647.07290 | -647.07167 | 0.03 | 0.69 | 3.58 | 4.28 |
| **19** | TS(18-18) | -647.06165 | -647.06202 | -647.06109 | -0.23 | 0.35 | 10.41 | 10.92 |
|  |  |  |  |  |  |  |  |  |
