# Supplementary material for: The epimerisation of 2-tetrahydropyranol catalysed by the tautomeric couples 2-pyridone/2-hydroxypyridine and formamide/formamidic acid as a model for the sugar's mutarotation: a theoretical study
Source: Royal Society of Chemistry journal article supplement (doi:10.1039/b210328c), 2003-02-11
Supplement: b210328c_tab4.doc [file b210328c_tab4.doc]

| **Electronic Supplementary Information - Table S4** Activation energies (*E*#/kcal mol-1), activation Gibbs energies (*G*#/kcal mol-1) and activation energies in solution (*E*#(sol)/kcal mol-1) of each elementary step of the mutarotation process. All geometries were optimised at the B3LYP/6-31G*(*) level (see Section 2). All energies were corrected for ZPE. Solvation energies in benzene were calculated by the PCM method by using either the UA and the Pauling’s atomic radii. | | | | | | | | | | | |
| --- | --- | --- | --- | --- | --- | --- | --- | --- | --- | --- | --- |
|  |  |  | |  |  | |  |  | | | |
| step |  | MP2/6-31G** | |  | MP4(SDQ)/6-31G** | |  | B3LYP/6-31G*(*) | | | |
|  |  |  |  |  |  |  |  |  |  |  |  |
|  |  | *E*# | *G*# |  | *E*# | *G*# |  | *E*# | G# | *E*#(sol) | *E*#(sol) |
|  |  |  |  |  |  |  |  |  |  | UA | Pauling |
|  |  |  |  |  |  |  |  |  |  |  |  |
| **1a ® 1b** |  | 15.9 | 11.8 |  | 21.1 | 17.0 |  | 14.0 | 9.9 | 13.6 | 14.2 |
| **1c ® 1b** |  | 6.9 | 6.0 |  | 10.9 | 10.0 |  | 4.5 | 3.7 | 3.5 | 2.9 |
| **1c ® 9** |  | 6.2 | 5.6 |  | 5.5 | 4.9 |  | 6.5 | 5.9 | 7.4 | 6.0 |
| **2a ® 2b** |  | 14.7 | 10.9 |  | 20.2 | 16.4 |  | 13.3 | 9.5 | 13.0 | 13.4 |
| **2c ® 2b** |  | 6.4 | 5.6 |  | 10.5 | 9.8 |  | 4.9 | 4.1 | 3.9 | 3.1 |
| **2c ® 9** |  | 8.7 | 7.6 |  | 7.9 | 6.8 |  | 8.5 | 7.4 | 9.1 | 7.4 |
| **3a ® 3b** |  | 15.5 | 11.7 |  | 18.4 | 14.6 |  | 11.2 | 7.4 | 10.6 | 9.8 |
| **3c ® 3b** |  | 6.4 | 5.5 |  | 12.0 | 11.1 |  | 6.1 | 5.2 | 5.2 | 4.7 |
| **3c ® 10** |  | 3.5 | 3.4 |  | 2.9 | 2.8 |  | 3.8 | 3.7 | 4.2 | 3.6 |
| **4a ® 4b** |  | 14.7 | 11.1 |  | 17.7 | 14.1 |  | 11.0 | 7.4 | 10.4 | 10.1 |
| **4c ® 4b** |  | 5.1 | 4.4 |  | 10.9 | 10.1 |  | 5.7 | 5.0 | 5.1 | 4.8 |
| **4c ® 10** |  | 4.9 | 4.2 |  | 4.1 | 3.5 |  | 4.7 | 4.0 | 4.9 | 4.0 |
| **5a ® 5b** |  | 24.1 | 21.0 |  | 27.6 | 24.5 |  | 19.8 | 16.7 | 19.5 | 20.1 |
| **5c ® 5b** |  | 4.6 | 3.7 |  | 8.6 | 7.7 |  | 2.3 | 1.4 | 1.4 | 1.0 |
| **5c ® 11** |  | 5.6 | 5.2 |  | 4.7 | 4.4 |  | 5.9 | 5.6 | 6.6 | 5.6 |
| **6a ® 6b** |  | 23.3 | 20.5 |  | 27.0 | 24.1 |  | 19.5 | 16.6 | 19.2 | 19.8 |
| **6c ® 6b** |  | 3.8 | 3.0 |  | 8.8 | 7.2 |  | 2.4 | 1.6 | 1.5 | 1.2 |
| **6c ® 11** |  | 7.7 | 6.6 |  | 6.7 | 5.6 |  | 7.5 | 6.4 | 7.9 | 6.6 |
| **7a ® 7b** |  | 10.8 | 6.7 |  | 14.6 | 10.6 |  | 7.2 | 3.1 | 6.5 | 5.9 |
| **7c ® 7b** |  | 12.8 | 12.5 |  | 17.5 | 17.2 |  | 11.0 | 10.8 | 10.2 | 9.9 |
| **7c ® 12** |  | 3.1 | 3.0 |  | 2.6 | 2.5 |  | 3.5 | 3.5 | 4.1 | 3.4 |
| **8a ® 8b** |  | 10.1 | 6.3 |  | 14.0 | 10.2 |  | 7.0 | 3.2 | 6.2 | 6.2 |
| **8c ® 8b** |  | 11.7 | 11.4 |  | 16.4 | 16.2 |  | 10.7 | 10.5 | 9.9 | 9.5 |
| **8c ® 12** |  | 4.8 | 4.0 |  | 4.1 | 3.3 |  | 4.6 | 3.8 | 4.9 | 3.6 |
|  |  |  |  |  |  |  |  |  |  |  |  |
| **15 ® 16** |  | 2.3 | -1.9 |  | 7.3 | 3.2 |  | 3.2 | -1.0 | 2.9 | 3.4 |
| **17 ® 16** |  | 2.6 | -1.1 |  | 4.1 | 0.4 |  | -0.1 | -3.8 | -0.4 | -1.0 |
| **18 ® 19** |  | 3.3 | -0.5 |  | 6.6 | 2.9 |  | 2.3 | -1.5 | 2.0 | 1.9 |
|  |  |  |  |  |  |  |  |  |  |  |  |
| **22 ® 23** |  | 17.7 | 15.4 |  | 19.9 | 17.6 |  | 15.3 | 13.0 | 15.2 | 16.0 |
| **24 ® 23** |  | -1.3 | -3.7 |  | 0.1 | -2.3 |  | -2.4 | -4.8 | -2.6 | -2.8 |
| **25 ® 26** |  | 6.4 | 2.8 |  | 9.2 | 5.6 |  | 3.8 | 0.2 | 3.3 | 3.6 |
|  |  |  |  |  |  |  |  |  |  |  |  |
